# Supplementary material for: Promoter Methylation in Head and Neck Squamous Cell Carcinoma Cell Lines Is Significantly Different than Methylation in Primary Tumors and Xenografts
Source: PLoS One. 2011 May 26;6(5):e20584. doi: 10.1371/journal.pone.0020584 (PMC3102742; doi:10.1371/journal.pone.0020584)
Supplement: Table S2 — Normal Tissue vs Minimally Transformed Cell Lines. Illumina probe ID and Gene name are listed. (XLS) [file pone.0020584.s002.xls]

## Sheet: Normal Mucosa vs Normal Keratin
Normal Mucosa vs Minimally Transformed Cell Lines
Probe	Gene_Name
cg00059930	RB1
cg00079563	ARFGAP3
cg00084687	GATAD1
cg00109274	DGKH
cg00116234	ADAMTSL1
cg00197381	FAM53C
cg00202702	MGC13040
cg00208967	OLFM2
cg00221494	FARP1
cg00268338	HECTD2
cg00282347	CHD5
cg00347904	SCUBE3
cg00404599	TSC22D3
cg00488300	TPSG1
cg00565688	TP73
cg00600110	FAM9A
cg00629585	GFI1B
cg00630164	KCNQ4
cg00635481	ZNF76
cg00645224	GTF2IRD2
cg00654814	MGAT5B
cg00671161	ATP7B
cg00812502	DGCR2
cg00824109	CHD4
cg00832994	ATPAF1
cg00887101	KIAA1698
cg00888007	CCND2
cg00888479	SLC24A3
cg01119135	C1orf116
cg01134491	MTHFR
cg01220033	WDR34
cg01293647	NEUROD2
cg01352108	KCNK4
cg01399317	FLJ46072
cg01401337	PHF2
cg01530101	KCNQ1DN
cg01580568	LAMB3
cg01602430	WDR36
cg01643580	KCNK3
cg01653445	BAI2
cg01868782	HEY2
cg01882179	SOCS2
cg01909921	GFI1B
cg01985090	HTF9C
cg01995513	MPP6
cg02131967	ACE
cg02136132	KCNK13
cg02162069	ZIM2
cg02164046	SST
cg02250594	ONECUT2
cg02335441	ASTE1
cg02451362	MAFG
cg02506728	PPP1R3D
cg02525756	RAB42
cg02553486	CORIN
cg02564523	C7orf19
cg02569333	SGK3
cg02595219	KCNE3
cg02755525	NETO2
cg02780295	PCDHGC3
cg02780849	GNG4
cg02848777	TLL2
cg02854090	HIST1H2AA
cg02879662	HIF3A
cg02887841	TBX1
cg02932689	MAP1LC3B
cg02955988	FLJ21106
cg02982734	MAGEL2
cg03003060	GPM6B
cg03036064	UCK2
cg03100196	ZYX
cg03132911	IQGAP2
cg03152785	KCNC4
cg03160815	NPB
cg03167763	UBXD3
cg03213216	FLJ40125
cg03382304	JAM2
cg03421300	SFN
cg03426225	FAM38B
cg03454353	ZFP37
cg03464655	FLJ39822
cg03522910	B4GALT3
cg03524308	ZNF585A
cg03534410	TMEM40
cg03561565	KCNS2
cg03588357	GPR68
cg03602500	FLJ00060
cg03642357	ADRBK2
cg03667047	KL
cg03718539	ETNK2
cg03774732	PAF1
cg03782453	FLJ90575
cg03789934	NALP11
cg03792653	C20orf77
cg03813215	BCL2
cg03826976	CYB5R2
cg03853987	CHST10
cg03925809	GTF2F1
cg03945800	ADCY9
cg04145477	QRSL1
cg04211745	BTG1
cg04216597	CACNA1G
cg04223844	IKBKB
cg04228553	CAPN7
cg04286933	APOBEC3G
cg04304927	SLC39A8
cg04329454	FLJ43752
cg04391111	TP73
cg04457979	KCNQ1DN
cg04473302	SLC26A4
cg04548378	CDKN1C
cg04557383	MT1H
cg04559909	CXCL5
cg04600618	C6orf206
cg04624659	SPAG17
cg04675937	CDKN2B
cg04697119	IGSF8
cg04735745	ZBED3
cg04794887	LETM1
cg04833050	LHFPL2
cg04845063	FAM13A1
cg04912050	IDUA
cg04950789	E2F5
cg04981492	SYDE1
cg04984200	CTSD
cg04987894	GSTM5
cg05098732	FOXA3
cg05131524	ADAM22
cg05200311	DEK
cg05243804	FECH
cg05270634	RND2
cg05306176	FVT1
cg05436658	PRKCB1
cg05445326	TM4SF19
cg05451974	C20orf35
cg05521696	SLC2A14
cg05523085	MYO5A
cg05547993	VAC14
cg05600717	FLJ13639
cg05607472	CSNK1A1
cg05675373	KCNC4
cg05684891	DAB2IP
cg05705366	SNAG1
cg05774801	SFRP2
cg05845178	IL17RC
cg05902852	MAGI2
cg05953394	PRKAG2
cg05970790	NFATC1
cg06005396	HCN2
cg06048156	ITGB3
cg06263495	ASCL2
cg06311778	TENC1
cg06321883	COL19A1
cg06363129	SOSTDC1
cg06508445	LOX
cg06572160	KCNC3
cg06600412	MLF1IP
cg06621126	HSF4
cg06668300	MAL
cg06675478	SOX1
cg06720424	RAP80
cg06780358	PTPRJ
cg06811800	ATP4B
cg06821120	RASSF1
cg06825142	DRD4
cg06831658	SOCS2
cg06834875	KIAA1822
cg06911113	UBXD3
cg06913228	UBE2J1
cg06919956	C9orf111
cg06952117	NAB1
cg06995715	FOXL1
cg07005513	FADS2
cg07051140	MGC15875
cg07054641	WDR52
cg07103819	DGAT1
cg07113600	KLF12
cg07115304	TRIB3
cg07115558	TLE2
cg07138512	RAP1GA1
cg07192857	HSPA1B
cg07263984	AP3S1
cg07310661	CUL3
cg07360076	FGFR3
cg07384961	CLDN6
cg07440414	TCF7
cg07478100	DERL2
cg07507271	CTBP1
cg07510052	HIGD2A
cg07533148	TRIM58
cg07581365	CBX8
cg07641524	MSRB3
cg07652213	MSH6
cg07671603	C7orf13
cg07730329	PCDHGA12
cg07752420	CDKN2A
cg07758904	TSCOT
cg07818646	FLJ11712
cg07883333	F11R
cg07912181	HSD17B12
cg07973461	BAGE
cg08009622	COL12A1
cg08024766	PSCD1
cg08027001	SLC30A4
cg08077673	MEST
cg08080029	CHD5
cg08090640	IFI35
cg08108311	WNK4
cg08124030	TM4SF1
cg08185241	G0S2
cg08186362	HRH3
cg08260959	HIST1H4F
cg08263357	PLAGL1
cg08307816	DEGS2
cg08393541	NUDC
cg08472583	RCP9
cg08519905	CD9
cg08536841	IZUMO1
cg08537652	PRDM16
cg08668790	ZNF154
cg08704884	UBE2M
cg08735298	C1orf122
cg08780378	EIF3S1
cg08821669	COX6A1
cg08858521	WFIKKN1
cg08891270	MDS032
cg08897388	LAMA4
cg08924430	FLJ20032
cg08996748	DISP2
cg09002774	SLC35B1
cg09009111	EMILIN2
cg09053680	UTF1
cg09099744	CDKN2A
cg09112782	UPF3A
cg09134003	NEUROG2
cg09137696	MT1A
cg09173897	KIAA1622
cg09239756	CKAP4
cg09245378	KIAA0157
cg09260564	VAPA
cg09290866	IL15RA
cg09412715	HELB
cg09453737	ZNF84
cg09479906	C10orf88
cg09556292	RCOR1
cg09595479	PRPH
cg09626984	GATA4
cg09644722	RNF190
cg09787254	FA2H
cg09801842	SFXN1
cg09826784	DGCR6L
cg09831553	LAMA5
cg09891106	TP53INP2
cg09938079	RHOG
cg09949775	COMP
cg09985279	MT1G
cg09991975	JOSD1
cg10038087	TLL2
cg10052840	SEMA6B
cg10088985	CXCL5
cg10163825	C16orf25
cg10185638	ATG9A
cg10203523	MRFAP1L1
cg10235817	ADRA2C
cg10353870	BIN1
cg10453365	RHCG
cg10479325	MGC33302
cg10642330	NNAT
cg10671802	MGC23280
cg10737521	KIAA0676
cg10741760	HTR6
cg10749011	ITGA6
cg10758292	DEFA1
cg10861599	TNFSF4
cg10883352
cg10892866	PYGO2
cg11004890	SLC4A11
cg11011602	RPL7A
cg11015241	ATP10A
cg11021744	SLC6A1
cg11042454	TUBB2C
cg11059483	ESR2
cg11063988	SIX5
cg11100802	TRIM52
cg11108890	VAMP5
cg11113534	C20orf70
cg11255230	BCL2
cg11377136	PKDREJ
cg11387131	KCNJ5
cg11399100	C19orf4
cg11399527	PDP2
cg11468711	ZNF710
cg11584690	ZNF574
cg11630242	AKAP10
cg11638200	PRKCQ
cg11706111	ZNF19
cg11930592	MSX1
cg11932564	TNFRSF13C
cg11991859	NPAS3
cg12006284	WT1
cg12034229	HUS1
cg12080675	KIAA0676
cg12113075	WDFY2
cg12188860	TOP1MT
cg12265829	ADCY4
cg12288365	KCTD7
cg12348970	SLC24A2
cg12374431	VAX2
cg12393697	KIAA1946
cg12422450	CHGA
cg12435359	BTBD1
cg12473775	RHOD
cg12515638	SFRP4
cg12567315	TSPAN13
cg12621514	DKK1
cg12628956	LOC317671
cg12727374	MAP6D1
cg12728629	MAGEA2
cg12736438	RAB20
cg12768605	LYPD5
cg12799895	NPTX2
cg12815841	LHPP
cg12854483	CNN1
cg12902719	LIMD1
cg12949975	GDF7
cg12998491	FAM78A
cg12998614	KISS1R
cg13021725	C20orf172
cg13035743	PRRT1
cg13060154	DAB2IP
cg13060997	CCNA1
cg13081704	KCNQ1DN
cg13127386	SLC4A8
cg13205516	GBAS
cg13319664	C21orf55
cg13332088	C14orf80
cg13431205	RB1
cg13436343	PUM1
cg13438673	ZNF526
cg13474734	FLJ43339
cg13515674	HMGB2
cg13551243	ZNF7
cg13574590	CCND2
cg13603171	MOXD1
cg13625403	TRIM29
cg13634678	TM2D3
cg13641903	WT1
cg13669740	VSIG9
cg13687831	MCM10
cg13752949	CP110
cg13765303	BOC
cg13821008	WASPIP
cg13916322	HRASLS3
cg13966710	FLJ36116
cg14003467	PCYT1A
cg14058432	PELI2
cg14058998	SEPW1
cg14062083	KRTAP13-4
cg14091223	DNAJB2
cg14100184	GNG13
cg14161426	ARTS-1
cg14162076	CLEC4D
cg14189571	ZFP42
cg14218343	ZNF32
cg14223995	UCP1
cg14234680	IMPAD1
cg14243026	HMP19
cg14289511	FLJ45256
cg14407437	FABP3
cg14507042	TRAF2
cg14547335	ATP2B2
cg14696396	TM6SF1
cg14724364	KCNJ11
cg14726637	CR1
cg14733672	HMOX1
cg14785449	ASNS
cg14839932	SRF
cg14892066	DCTD
cg14963371	GPR3
cg15018760	SCO2
cg15044041	WDR52
cg15083233	AKAP2
cg15103675	UAP1
cg15146752	EPHA2
cg15201877	PTGER3
cg15235185	UCHL5
cg15319457	HES6
cg15350194	FAM70B
cg15361590	PCDHGC4
cg15442702	FGFR4
cg15461516	CHST1
cg15502888	SOCS3
cg15503799	PRCC
cg15559737	CRYBA4
cg15594133	TSPAN14
cg15613048	KIF17
cg15633390	EIF4E
cg15737319	MTHFD2
cg15772393	SAP30
cg15780888	PRKCABP
cg15796682	RNH1
cg15853125	TIAM1
cg15857475	RECQL4
cg15868151	ABCC4
cg15868302	FOXD2
cg15928132	CCKAR
cg15944762	SPAG9
cg15959756	SPAST
cg15992730	GDF3
cg16041611	SRF
cg16094954	BCL3
cg16101572	ZNF219
cg16109297	CDC20
cg16116363	SH3GLB1
cg16153267	RB1
cg16177830	TNFRSF17
cg16200844	ITCH
cg16245844	ADIPOR2
cg16246410	NR4A2
cg16249454	CXCL2
cg16270890	FAHD1
cg16290693	SPSB1
cg16313343	BRF1
cg16335762	CMTM3
cg16345880	SARS
cg16353836	SAFB
cg16385933	PDCD4
cg16417937	NUDC
cg16486059	C1orf135
cg16557944	GPX7
cg16574065	RAD52B
cg16584573	FGF8
cg16598810	DEPDC1
cg16616734	ANKRD13
cg16645539	SNAPC3
cg16652063	SLC13A5
cg16741710	TP73
cg16753336	NPAS1
cg16756998	ZDHHC8
cg16778809	ADAM23
cg16790239	MC1R
cg16792632	ESR2
cg16802152	CARF
cg16823737	CKAP5
cg16864658	CCK
cg16878652	GPS1
cg16998213	METRN
cg17001035	PCGF5
cg17020834	GRIA1
cg17095279	APOH
cg17099569	GLI2
cg17119387	KIAA0664
cg17142470	SORBS3
cg17188046	T
cg17197538	KRAS
cg17296166	FLJ10781
cg17328659	STUB1
cg17347389	TRIM9
cg17558126	RASSF5
cg17560332	BOLL
cg17610929	ACCN4
cg17618092	RBM14
cg17663463	ZIM2
cg17682828	FXYD7
cg17710021	G0S2
cg17731261	ACHE
cg17804302	NKD1
cg17818900	CRIP2
cg17846100	MT
cg17886204	DKFZp434I1020
cg17902858	NPDC1
cg17965230	PRDM1
cg17982102	RAB31
cg18064655	EEF2
cg18189601	RING1
cg18253802	MYB
cg18294257	SEC14L3
cg18349835	VIPR2
cg18383391	MON1B
cg18387216	HDAC2
cg18437633	ITGB6
cg18450227	MAPK4
cg18454685	CACNA1G
cg18462653	DEFB119
cg18540871	FUCA2
cg18719814	NFXL1
cg18730023	PTK9
cg18765542	DGKZ
cg18806365	FABP5
cg18840461	ANKRD43
cg18904346	LHX2
cg19026260	CNIH2
cg19028160	HDAC4
cg19091474	NEO1
cg19128498	FBXL5
cg19148051	LRRC47
cg19159162	HSPA1B
cg19168338	CORO7
cg19210770	ACCN4
cg19267846	PHOSPHO1
cg19343464	GRIA4
cg19352038	PAX3
cg19352977	AZIN1
cg19363546	POU2F3
cg19462352	PROCA1
cg19481686	CDKN2B
cg19713460	SYNGR1
cg19716462	CCT4
cg19738333	REEP4
cg19769182	PRRT2
cg19783114	TP73
cg19803671	UBE2E2
cg19850348	PYGO1
cg19881177	ZNF367
cg19902569	AHNAK
cg19904463	FABP5
cg19928046	CD74
cg19946699	SH3BGR
cg19965511	HCRT
cg20011352	GPR124
cg20019546	SFRP4
cg20028291	BCAS4
cg20050826	K6IRS2
cg20074371	STT3B
cg20084646	HSPC023
cg20172280	OLFML2B
cg20199629	SAMD14
cg20209009	TBX21
cg20218060	CLK1
cg20222911	MTA1
cg20261915	GLP2R
cg20276750	PPM1M
cg20300246	LHX3
cg20308679	FRZB
cg20314325	CASC5
cg20314660	DDX39
cg20329958	CRH
cg20354892	MGC33648
cg20406374	SQSTM1
cg20420254	SMPD1
cg20449692	CLDN11
cg20483374	C1QTNF5
cg20543416	MMP25
cg20656116	CD59
cg20716209	STAT3
cg20718816	LTBP2
cg20723355	FBXO39
cg20728639	ABTB2
cg20744464	MFI2
cg20793071	TMEM59
cg20802051	AK3L1
cg20822579	RIPK3
cg20835282	C3orf62
cg20858478	B4GALNT2
cg20870559	OAS2
cg21030598	PAK2
cg21087137	MGC26856
cg21099326	TRIM35
cg21179457	INSM2
cg21184174	NGFB
cg21211608	RAP1B
cg21223368	IDH3A
cg21237591	IGF2AS
cg21243096	POU3F1
cg21296230	GREM1
cg21421701	SNFT
cg21457804	CT45-2
cg21459867	IDUA
cg21530890	SOX8
cg21547708	SSTR2
cg21548414	CLIC5
cg21553596	FAM3B
cg21572316	ABCA1
cg21577049	WDR69
cg21602520	BCL2
cg21625881	GNAS
cg21666675	CHCHD4
cg21709140	GORASP2
cg21712678	ZC3H7B
cg21756353	DHPS
cg21838334	NES
cg21849289	C1orf123
cg21902346	LRP16
cg21927975	GPR153
cg21974239	MAPK12
cg21992250	SLC15A3
cg22007326	TMED2
cg22009489	MYEOV2
cg22037648	SEMA3B
cg22054191	POU2F2
cg22085335	KCNF1
cg22141781	NDUFA12
cg22176097	MGC23280
cg22190114	NALP8
cg22269795	EFHD2
cg22298088	NNAT
cg22320000	HNRPU
cg22334665	SLC22A16
cg22335801	TNFRSF4
cg22343001	ARMCX2
cg22367989	NRP2
cg22374142	HSF4
cg22377237	GNB2
cg22407458	TCP11
cg22471346	GAS7
cg22476295	PDGFA
cg22499237	PDPK1
cg22524514	CST6
cg22631938	GPR27
cg22633722	CBS
cg22704775	FEN1
cg22728790	PIN1
cg22766145	BHLHB5
cg22791453	ASS
cg22821834	GPR135
cg22828804	FLJ13149
cg22843446	ASAM
cg22902083	CNN2
cg22996555	GCS1
cg23048366	HAGH
cg23096553	KCNMB4
cg23152772	FIBCD1
cg23189044	KCNE3
cg23196133	POLR2A
cg23207990	SFRP2
cg23221013	MGC2463
cg23256150	NR1H4
cg23323711	RPL22
cg23451311	DMAP1
cg23473904	COL6A2
cg23566503	NNAT
cg23687960	GGH
cg23713520	TM4SF11
cg23748737	SCARF2
cg23771603	MYO3A
cg23843505	MYBL2
cg23859078	C7orf30
cg23906144	OVCA2
cg23938476	C6orf136
cg24027679	SLC2A7
cg24056567	PSD3
cg24058120	MFI2
cg24124977	TBC1D16
cg24139421	SLC22A18
cg24349555	HECA
cg24441350	TPPP
cg24496666	GIPC2
cg24497877	PUSL1
cg24516061	RGS19
cg24520800	RIOK1
cg24582500	TXNL2
cg24624819	LPIN1
cg24653181	RHCG
cg24693053	MFSD7
cg24723331	ST8SIA1
cg24792749	RGS9BP
cg24813212	TEKT2
cg24868271	PLCD1
cg24886748	SLC12A7
cg25007250	NOS3
cg25027167	DGAT1
cg25028542	ANLN
cg25139619	C13orf25
cg25179963	NT5DC1
cg25221254	ASAH3
cg25226247	TFAP2B
cg25258291	FARP1
cg25268678	PLEKHG6
cg25325612	VPS35
cg25392935	VCL
cg25428293	TIGD6
cg25462291	HEYL
cg25485128	UBA2
cg25537774	AGPAT2
cg25552492	LGI3
cg25635316	LOC90693
cg25650110	ZDHHC8
cg25705900	RNF144
cg25729765	SP3
cg25753817	INPP1
cg25786436	PRKAG2
cg25817752	PDIK1L
cg25885108	TP73
cg25906332	SLC25A29
cg25910443	C9orf3
cg25920951	FAM70B
cg25927124	PRKAR2A
cg25953146	MGC50273
cg25971347	FOXF1
cg25973092	SESN2
cg26045220	KIAA1324
cg26054540	NKD2
cg26057752	PGAM2
cg26090652	C1QTNF5
cg26102760	PASK
cg26104204	MAP3K10
cg26151310	SMARCA3
cg26187237	IGFBP2
cg26207503	MYF5
cg26399201	ANKRD43
cg26537639	CYBA
cg26607785	TBX21
cg26614073	SCAP
cg26624118	SLC43A1
cg26674929	IREB2
cg26704579	CYP1A1
cg26709720	B3GALT5
cg26750319	KCNQ1
cg26771272	SMCR7
cg26847093	FLJ11712
cg26850754	CD8B1
cg26887625	ZNF497
cg26952662	CTHRC1
cg26976437	LY6K
cg27016990	KCNQ3
cg27079464	CBX8
cg27090216	TNFRSF10C
cg27091787	HYAL2
cg27120999	HSPA2
cg27143049	PDE3B
cg27247832	C16orf52
cg27352136	SLC12A9
cg27403635	KCNN2
cg27425675	DEXI
cg27431859	CDC34
cg27627570	CEECAM1
cg27641018	EPDR1
