# Supplementary material for: Promoter Methylation in Head and Neck Squamous Cell Carcinoma Cell Lines Is Significantly Different than Methylation in Primary Tumors and Xenografts
Source: PLoS One. 2011 May 26;6(5):e20584. doi: 10.1371/journal.pone.0020584 (PMC3102742; doi:10.1371/journal.pone.0020584)
Supplement: Table S5 — Primary Tumors vs Normal Mucosa. Illumina probe ID and Gene name are listed. (XLS) [file pone.0020584.s005.xls]

## Sheet: Primary HNSCC vs Normal Mucosa
Primary HNSCC vs Normal Mucosa
Probe	Gene_Name
cg00061629	ALX4
cg00176879	PTPRA
cg01354473	HOXA9
cg01381846	HOXA9
cg01546563	GATA4
cg02162069	ZIM2
cg02164046	SST
cg02919422	SOX17
cg02955504	TXNL4A
cg02955988	FLJ21106
cg03580247	SLC4A1
cg03602500	FLJ00060
cg03789934	NALP11
cg03874199	HOXD12
cg03902905	SLC3A1
cg03975694	ZNF540
cg04457979	KCNQ1DN
cg04490714	SLC6A2
cg04598121	PENK
cg04875162	PABPC5
cg05445326	TM4SF19
cg05485062	SERPINA12
cg05521696	SLC2A14
cg05647859	LIN7A
cg06973652	BRCA1
cg07239938	ELA2
cg07376535	ADCYAP1
cg07434278	CYP21A2
cg07533148	TRIM58
cg08668790	ZNF154
cg08758850	NR6A1
cg08832227	KCNA1
cg09626984	GATA4
cg09748975	MSX1
cg09971811	CST7
cg10633491	ZBTB7A
cg10642330	NNAT
cg10648113	SULT1B1
cg10660256	BHMT
cg10758292	DEFA1
cg11391732	HSPB3
cg11657808	RYR2
cg11981599	GATA4
cg12125117	GPR97
cg12374721	PRAC
cg13081704	KCNQ1DN
cg13282837	TCL1A
cg13314167	C9orf84
cg13587552	SCNN1D
cg13870866	TBX20
cg13912117	ADCY8
cg14757296	HYAL1
cg14991487	HOXD9
cg15044041	WDR52
cg15361590	PCDHGC4
cg15540820	EOMES
cg15747595	TSPYL5
cg15761233	FLJ22555
cg15945602	VAT1
cg17188046	T
cg17241310	BARHL2
cg17298704	CLDN18
cg17560332	BOLL
cg18135555	PIWIL2
cg18239753	KHDRBS2
cg18294257	SEC14L3
cg18462653	DEFB119
cg18546622	ALX4
cg18572014	DCC
cg19025723	ATPIF1
cg19246110	ZNF671
cg19352038	PAX3
cg20329958	CRH
cg21142398	GLIS1
cg21296230	GREM1
cg21458907	CADPS
cg21790626	ZNF154
cg22082462	CPNE6
cg22134325	NPAS4
cg23130254	HOXD12
cg23410113	CASP8
cg24199834	POU4F2
cg24646414	GATA4
cg24826867	IRF8
cg24831427	COQ3
cg25002911	RB1
cg25028542	ANLN
cg25177139	SLC10A6
cg25596297	FLJ32447
cg25875213	FLJ37549
cg26521404	HOXA9
cg26550234	SLC39A12
cg26709720	B3GALT5
cg26976437	LY6K
cg26986815	CASP8
cg27009703	HOXA9
cg27176392	GNG7
cg27453644	BCAP31
