# Supplementary material for: Promoter Methylation in Head and Neck Squamous Cell Carcinoma Cell Lines Is Significantly Different than Methylation in Primary Tumors and Xenografts
Source: PLoS One. 2011 May 26;6(5):e20584. doi: 10.1371/journal.pone.0020584 (PMC3102742; doi:10.1371/journal.pone.0020584)
Supplement: Table S7 — Gene list used for selection of bisulfate sequencing primer targets. Illumina probe ID, gene name, and statistical significance of each target is provided. (XLS) [file pone.0020584.s007.xls]

## Sheet: Tumor+XGvNormal_BH05.txt
ID	Chr	MapInfo	Gene	CGct	Mean Difference	Mean Beta	t-stat	P.Value	adj.P.Val	B value	Avg Tumor+XG	Avg Normal		TUMOR1	TUMOR2	tumor3	GBMC12_Tumor	GBMC29_Tumor	XENOGRAFT1	XENOGRAFT2	xenograft3	GBMC12_XG	GBMC29_XG	nmucosa1	nmucosa2	UPPP32	UPPP46	UPPP61	UPPP64	UPPP65	FullMeth_HCT116	NonMeth_DKO	JHU011	JHU022	FADU	UM22A	UM22B	OKF6	NOK-SI
cg08668790	19	62912474	ZNF154	3	0.621276	0.621859	6.61869	1.23555e-07	0.00103175	7.3673	0.757915	0.136639		0.680676	0.667049	0.948051	0.59579	0.86492	0.949073	0.34916	0.897898	0.91927	0.89842	0.139476	0.119535	0.0727733	0.160552	0.15104	0.105269	0.207826	0.943067	0.176718	0.961044	0.955778	0.972746	0.949765	0.931713	0.601368	0.949344
cg21790626	19	62912306	ZNF154	5	0.695272	0.614442	6.50885	1.71629e-07	0.00103175	7.07261	0.786679	0.0914067		0.699068	0.749519	0.969095	0.625634	0.902242	0.9394	0.316043	0.935122	0.929341	0.954045	0.0603365	0.0994959	0.0427917	0.0780381	0.141671	0.0731215	0.144392	0.970595	0.483001	0.961833	0.977049	0.967338	0.962084	0.94966	0.0871003	0.95748
cg21296230	15	30797828	GREM1	4	0.568235	0.625802	6.29644	3.24738e-07	0.00130144	6.4997	0.746366	0.178131		0.419857	0.673092	0.953028	0.492635	0.804048	0.596404	0.512036	0.950154	0.951481	0.96096	0.202567	0.123653	0.0700401	0.234822	0.155306	0.166433	0.294095	0.94826	0.512729	0.971345	0.968861	0.97999	0.951268	0.959026	0.484241	0.934521
cg09626984	8	11603505	GATA4	4	0.499276	0.660126	5.95973	8.96455e-07	0.00213283	5.58471	0.7799	0.280625		0.645397	0.747289	0.857283	0.652452	0.825284	0.868164	0.615738	0.922243	0.864151	0.889265	0.163457	0.0466384	0.174748	0.393872	0.313101	0.408821	0.463735	0.952267	0.445549	0.91435	0.885322	0.958713	0.895327	0.911574	0.447392	0.901145
cg15540820	3	27740287	EOMES	3	0.545883	0.598597	5.94086	9.49053e-07	0.00213283	5.53324	0.687729	0.141846		0.443388	0.560468	0.882705	0.48453	0.830032	0.925365	0.438578	0.830174	0.847485	0.872202	0.113331	0.113441	0.0683475	0.193015	0.111963	0.196981	0.195843	0.917759	0.664126	0.942946	0.944706	0.965848	0.921034	0.93015	0.250971	0.918141
cg18546622	11	44281605	ALX4	4	0.528532	0.587329	5.88676	1.11769e-06	0.00213283	5.38556	0.7023	0.173768		0.577542	0.545374	0.933952	0.534318	0.778353	0.788723	0.333674	0.87336	0.905335	0.838796	0.163267	0.145435	0.247481	0.210954	0.152143	0.129543	0.167555	0.936886	0.430021	0.922444	0.835501	0.97373	0.931909	0.801318	0.398856	0.714094
cg07533148	1	246087435	TRIM58	6	0.571384	0.625813	5.85195	1.24177e-06	0.00213283	5.29047	0.7583	0.186917		0.628114	0.623332	0.950237	0.656389	0.82105	0.945292	0.529734	0.84676	0.931596	0.837492	0.298949	0.118567	0.0539549	0.283299	0.146868	0.217256	0.189524	0.972046	0.0358805	0.973981	0.965575	0.983516	0.955413	0.976785	0.650035	0.67949
cg05485062	14	94053616	SERPINA12	3	-0.547588	0.594301	-5.7428	1.72773e-06	0.00255568	4.99197	0.31413	0.861718		0.553502	0.343309	0.143694	0.358772	0.331532	0.195009	0.568091	0.19158	0.109416	0.227273	0.83388	0.823413	0.812715	0.84805	0.901998	0.917029	0.894942	0.907262	0.0738575	0.643747	0.516526	0.975191	0.949116	0.874463	0.543246	0.914223
cg24826867	16	84490354	IRF8	7	0.657475	0.580328	5.70913	1.9131e-06	0.00255568	4.89981	0.755253	0.0977782		0.620659	0.614115	0.954417	0.639772	0.820308	0.888399	0.50982	0.866791	0.965318	0.806078	0.124208	0.174356	0.0633883	0.100921	0.129115	0.0326695	0.0597894	0.947908	0.0364909	0.974791	0.975236	0.832974	0.965758	0.962865	0.0568647	0.965525
cg15361590	5	140844885	PCDHGC4	3	0.571612	0.57872	5.53612	3.23012e-06	0.00388357	4.42579	0.694694	0.123082		0.551866	0.502888	0.941214	0.389234	0.778459	0.928799	0.46597	0.896826	0.849227	0.876559	0.148851	0.0798067	0.139859	0.147791	0.101653	0.11006	0.133551	0.919529	0.0702897	0.950264	0.955018	0.419283	0.947935	0.919655	0.908091	0.914027
cg24199834	4	147779576	POU4F2	5	0.5374	0.587459	5.44583	4.24546e-06	0.00464028	4.17822	0.703229	0.165829		0.555022	0.633024	0.937293	0.545287	0.803767	0.782074	0.476594	0.926136	0.90977	0.542172	0.156273	0.148131	0.0805556	0.24296	0.110629	0.223142	0.199112	0.914061	0.435807	0.917901	0.925992	0.931636	0.915548	0.899886	0.133288	0.927868
cg06973652	17	38532148	BRCA1	3	-0.482898	0.587178	-5.34205	5.81178e-06	0.00549858	3.89364	0.326215	0.809113		0.686576	0.211992	0.0891244	0.519832	0.105326	0.349144	0.519239	0.255887	0.488777	0.0591822	0.756019	0.848786	0.899563	0.727534	0.875466	0.767178	0.789242	0.700133	0.0502355	0.885573	0.850763	0.580959	0.852218	0.839821	0.879954	0.678093
cg19246110	19	62930740	ZNF671	3	0.640102	0.543388	5.32755	6.07237e-06	0.00549858	3.85388	0.702243	0.0621416		0.674255	0.749364	0.967233	0.469556	0.868084	0.964744	0.330712	0.65406	0.738221	0.868704	0.111364	0.0843985	0.0417746	0.0634796	0.0571676	0.0347424	0.0420639	0.941835	0.0650222	0.964428	0.962133	0.981029	0.949398	0.923994	0.0362976	0.584041
cg15044041	3	114643003	WDR52	3	0.342412	0.753227	5.26922	7.24353e-06	0.00549858	3.69399	0.800701	0.458289		0.628274	0.608517	0.924061	0.697314	0.86536	0.91973	0.657241	0.947018	0.939358	0.939163	0.374628	0.519691	0.358953	0.507208	0.475833	0.508228	0.463483	0.893536	0.887441	0.924088	0.930218	0.95637	0.909765	0.935807	0.89534	0.917283
cg12374721	17	44154639	PRAC	5	0.543167	0.617807	5.26578	7.31926e-06	0.00549858	3.68456	0.771968	0.2288		0.363335	0.784647	0.959732	0.736774	0.898866	0.438485	0.459112	0.911888	0.928151	0.905202	0.161875	0.248021	0.112954	0.303669	0.196433	0.258642	0.320007	0.953765	0.0771134	0.966362	0.921627	0.948341	0.952859	0.937633	0.372739	0.944743
cg24646414	8	11603134	GATA4	3	0.457873	0.649751	5.24581	7.77475e-06	0.00549858	3.62982	0.750518	0.292645		0.479198	0.65949	0.914558	0.632038	0.797496	0.905603	0.559732	0.94904	0.851345	0.911765	0.323385	0.23585	0.137229	0.333242	0.293724	0.32375	0.401333	0.936832	0.59741	0.835842	0.930896	0.96954	0.912459	0.922719	0.30497	0.77407
cg18135555	8	22188937	PIWIL2	4	-0.511139	0.642277	-5.04595	1.42123e-05	0.00862042	3.08264	0.331952	0.843091		0.431472	0.502139	0.116626	0.296394	0.401249	0.133708	0.866498	0.118481	0.0449803	0.209729	0.881999	0.888013	0.771809	0.858503	0.891024	0.76301	0.847277	0.973816	0.10787	0.904066	0.966485	0.97881	0.961462	0.872314	0.955852	0.955626
cg17298704	3	139200297	CLDN18	3	-0.543446	0.61756	-5.02703	1.50464e-05	0.00862042	3.03089	0.348469	0.891915		0.406759	0.377955	0.166359	0.542214	0.240707	0.0763802	0.665854	0.353704	0.277404	0.105263	0.909763	0.851675	0.877023	0.857293	0.922902	0.927898	0.89685	0.95016	0.035127	0.83819	0.888121	0.948664	0.938094	0.198138	0.935126	0.868943
cg25875213	19	42874895	FLJ37549	5	0.606262	0.544254	5.02549	1.51161e-05	0.00862042	3.0267	0.683949	0.0776867		0.603548	0.447355	0.716982	0.588685	0.831219	0.972478	0.352255	0.951177	0.934263	0.730053	0.0938053	0.119174	0.0448138	0.0861345	0.0547012	0.073281	0.0718975	0.953657	0.0452691	0.975347	0.631065	0.970585	0.953363	0.975843	0.0531057	0.920552
cg03602500	19	59739533	FLJ00060	4	-0.472555	0.444949	-5.02086	1.53287e-05	0.00862042	3.01402	0.3261	0.798655		0.514568	0.384385	0.107596	0.478219	0.221906	0.222337	0.621414	0.165588	0.201061	0.240166	0.837468	0.808853	0.848058	0.798794	0.799591	0.729256	0.768566	0.919846	0.0855263	0.161528	0.0824286	0.528604	0.335374	0.122726	0.163653	0.421156
cg10088985	4	75083177	CXCL5	5	0.487178	0.560556	5.00629	1.60162e-05	0.00862042	2.97421	0.640776	0.153599		0.185097	0.640124	0.920741	0.422653	0.805395	0.328863	0.36214	0.925661	0.616069	0.889109	0.147192	0.208161	0.110654	0.162858	0.112277	0.139655	0.194395	0.866733	0.0693856	0.948059	0.933527	0.945715	0.925258	0.899867	0.920068	0.894794
cg17296166	19	51666407	FLJ10781	5	0.514944	0.539918	4.98249	1.72058e-05	0.00862042	2.9092	0.61597	0.101026		0.0646412	0.650186	0.758839	0.578763	0.621051	0.0643227	0.487712	0.965358	0.78235	0.634829	0.057426	0.0522056	0.0372027	0.112424	0.108099	0.154897	0.184925	0.975693	0.0282015	0.97649	0.945817	0.966286	0.95485	0.951006	0.973426	0.950869
cg04534765	18	73091357	GALR1	5	0.542188	0.626377	4.98119	1.72735e-05	0.00862042	2.90564	0.771264	0.229076		0.347699	0.691805	0.976625	0.663855	0.84215	0.518361	0.520513	0.957068	0.975566	0.966099	0.0994785	0.0573417	0.0449217	0.341141	0.263822	0.356626	0.440201	0.974806	0.0578237	0.975247	0.979752	0.981714	0.9581	0.910882	0.422584	0.96163
cg13314167	9	113597374	C9orf84	4	-0.553593	0.454977	-4.96889	1.79249e-05	0.00862042	2.87205	0.261229	0.814821		0.363621	0.37866	0.102672	0.394461	0.138631	0.123556	0.533789	0.136328	0.162791	0.140105	0.743283	0.809426	0.881423	0.674152	0.853659	0.899372	0.842434	0.856832	0.120131	0.0340277	0.32917	0.0865727	0.0554454	0.911223	0.703537	0.554113
cg11657808	1	235272573	RYR2	4	0.590082	0.566682	4.95044	1.89479e-05	0.00869539	2.82169	0.716971	0.126889		0.5	0.770373	0.979196	0.792631	0.728187	0.837497	0.280083	0.671119	0.883851	0.847302	0.0659298	0.063334	0.0589922	0.22882	0.0963128	0.210518	0.164317	0.966411	0.0422374	0.980503	0.904655	0.98074	0.962795	0.957556	0.0664996	0.693866
cg07545232	X	151688898	MAGEA3	3	-0.543662	0.567587	-4.94043	1.95272e-05	0.00869539	2.79436	0.362992	0.906654		0.597942	0.537033	0.636887	0.430731	0.248367	0.450955	0.523408	0.048836	0.221719	0.0220055	0.920238	0.922664	0.936279	0.88764	0.903123	0.885497	0.891138	0.925445	0.0240879	0.635861	0.12532	0.944551	0.720814	0.299962	0.508765	0.507988
cg09971811	20	24878099	CST7	4	-0.499044	0.652336	-4.87095	2.40606e-05	0.0103315	2.6049	0.368942	0.867986		0.371656	0.783591	0.773895	0.482672	0.155263	0.180569	0.20324	0.187059	0.288092	0.0750105	0.904631	0.889985	0.881378	0.850425	0.832206	0.877705	0.839572	0.946106	0.0375516	0.958222	0.936405	0.933627	0.928191	0.745519	0.93416	0.964015
cg17560332	2	198359548	BOLL	3	0.462682	0.597753	4.85193	2.54741e-05	0.010508	2.55309	0.688117	0.225435		0.601228	0.605883	0.872981	0.513623	0.793963	0.92501	0.419758	0.726997	0.849414	0.809205	0.276041	0.336982	0.174128	0.215846	0.188832	0.20132	0.184898	0.9045	0.0272355	0.899403	0.889683	0.937768	0.878241	0.879855	0.525665	0.903115
cg02164046	3	188870842	SST	5	0.491939	0.57903	4.84232	2.62198e-05	0.010508	2.52691	0.663677	0.171738		0.486694	0.692993	0.939291	0.668538	0.520958	0.708868	0.503547	0.939578	0.945445	0.276044	0.0913956	0.157029	0.0641642	0.235396	0.176612	0.249649	0.227917	0.923022	0.0395028	0.963231	0.866509	0.972597	0.955948	0.911926	0.572789	0.965133
cg14991487	2	176695650	HOXD9	3	0.624085	0.578094	4.8235	2.77428e-05	0.0105798	2.47567	0.780331	0.156246		0.711742	0.791942	0.956387	0.602493	0.920106	0.892299	0.603582	0.879921	0.683793	0.873013	0.0855656	0.0566369	0.0499735	0.210596	0.133297	0.289415	0.268239	0.968697	0.0319856	0.981718	0.981959	0.986267	0.974321	0.0835312	0.0580309	0.954922
cg13587552	1	1206304	SCNN1D	3	-0.538354	0.49167	-4.81853	2.81588e-05	0.0105798	2.46216	0.261516	0.79987		0.469524	0.440303	0.0520868	0.391858	0.215292	0.016084	0.546816	0.112935	0.0696217	0.0552061	0.865069	0.886997	0.812327	0.701822	0.819709	0.752854	0.760312	0.963451	0.0333848	0.407711	0.493594	0.961585	0.836323	0.452677	0.225671	0.440212
cg02919422	8	55533097	SOX17	3	0.484796	0.63691	4.80411	2.94027e-05	0.0107124	2.42294	0.760989	0.276193		0.706769	0.648933	0.955172	0.672791	0.824741	0.926989	0.498541	0.70706	0.946126	0.888767	0.233091	0.202502	0.0969646	0.398895	0.246367	0.328547	0.426982	0.935073	0.39357	0.944966	0.947386	0.717616	0.938569	0.922633	0.121191	0.929407
cg24989962	14	51804036	PTGDR	5	0.537722	0.585537	4.75732	3.38263e-05	0.0119616	2.29575	0.728313	0.190592		0.164917	0.709142	0.947886	0.724893	0.887986	0.159319	0.435885	0.751509	0.970208	0.962395	0.114467	0.0680407	0.0839117	0.316404	0.191242	0.267911	0.292163	0.952238	0.0469787	0.97038	0.964979	0.978895	0.959666	0.969194	0.439321	0.894034
cg01295203	8	71146753	PRDM14	4	0.603508	0.563823	4.73733	3.5911e-05	0.0122314	2.24148	0.743258	0.13975		0.0801233	0.739978	0.986063	0.6446	0.847699	0.263623	0.555699	0.963498	0.978684	0.892977	0.0841462	0.077435	0.0969376	0.230866	0.11958	0.182215	0.187071	0.955717	0.0197301	0.984805	0.976537	0.989087	0.957497	0.958978	0.0744136	0.811439
cg18462653	20	29441837	DEFB119	3	-0.458751	0.32693	-4.73076	3.66241e-05	0.0122314	2.22364	0.201648	0.660399		0.439067	0.259205	0.1143	0.223007	0.166325	0.113031	0.328423	0.072697	0.0727838	0.139023	0.694652	0.84053	0.663344	0.464623	0.709792	0.624305	0.625546	0.913864	0.0287882	0.0475176	0.021217	0.568164	0.224187	0.0511204	0.0387433	0.0559242
cg26550234	10	18279799	SLC39A12	4	-0.367686	0.607671	-4.72073	3.77392e-05	0.0122632	2.19642	0.430184	0.79787		0.647994	0.404151	0.39147	0.378719	0.420199	0.330396	0.685739	0.251938	0.217216	0.474227	0.753751	0.71766	0.802946	0.736675	0.864677	0.853918	0.855462	0.738876	0.165597	0.872148	0.614407	0.689258	0.709779	0.615546	0.851128	0.755556
cg03375833	3	9834360	TTLL3	3	-0.476548	0.434252	-4.70815	3.91857e-05	0.012343	2.16229	0.246473	0.723021		0.238476	0.334402	0.104545	0.401783	0.166323	0.14849	0.531424	0.153495	0.194853	0.0929544	0.748415	0.697328	0.70611	0.743218	0.738839	0.738392	0.688846	0.74582	0.104064	0.0475462	0.491504	0.731919	0.225793	0.689062	0.0641339	0.762813
cg00061629	11	44281834	ALX4	3	0.528711	0.600781	4.69315	4.09819e-05	0.012343	2.12162	0.813396	0.284686		0.770893	0.559682	0.882221	0.824643	0.865505	0.743858	0.541058	0.955616	0.952535	0.968412	0.242872	0.196106	0.546139	0.373539	0.172336	0.161808	0.3	0.96462	0.0824318	0.756043	0.780506	0.947328	0.967241	0.591113	0.0701202	0.40369
cg05647859	12	79855849	LIN7A	5	0.448571	0.59597	4.69247	4.10646e-05	0.012343	2.11979	0.676263	0.227692		0.42975	0.779291	0.901381	0.563285	0.853996	0.621053	0.437803	0.728485	0.561886	0.830491	0.223556	0.169922	0.146737	0.38213	0.14658	0.226037	0.298883	0.902359	0.440199	0.954147	0.9617	0.959208	0.933586	0.895833	0.209009	0.937922
cg03874199	2	176672702	HOXD12	3	0.572039	0.544216	4.67476	4.32958e-05	0.0126962	2.07178	0.675993	0.103954		0.227568	0.672287	0.967991	0.515444	0.817926	0.639344	0.405175	0.793799	0.812173	0.87157	0.0621562	0.059593	0.0528397	0.135303	0.084791	0.140396	0.192597	0.951202	0.0183164	0.963727	0.94537	0.97057	0.952261	0.930495	0.0267268	0.939985
cg23750142	8	61356430	CA8	5	0.603228	0.507884	4.61146	5.2291e-05	0.014789	1.90052	0.656744	0.0535165		0.0398769	0.816073	0.979858	0.687731	0.786254	0.189283	0.301372	0.739878	0.965976	0.593678	0.0317561	0.0410282	0.0300283	0.0867186	0.0452357	0.0383798	0.101469	0.980834	0.0291485	0.975266	0.972863	0.980726	0.816368	0.957975	0.0626233	0.954579
cg15408454	X	151617883	MAGEA6	3	-0.509173	0.58391	-4.60762	5.28927e-05	0.014789	1.89014	0.393349	0.902522		0.612636	0.560465	0.697322	0.463766	0.292699	0.490669	0.560498	0.0489525	0.277802	0.0259986	0.916176	0.914364	0.935501	0.899638	0.870187	0.912166	0.869623	0.909675	0.029211	0.623894	0.13732	0.953462	0.773846	0.353808	0.505217	0.546776
cg07434278	6	32114223	CYP21A2	4	-0.431184	0.67092	-4.57909	5.75804e-05	0.0151692	1.8131	0.453413	0.884597		0.519706	0.441308	0.23223	0.39837	0.633083	0.0469778	0.761173	0.515698	0.0551406	0.524006	0.879615	0.90445	0.886049	0.884529	0.902541	0.871353	0.86364	0.92161	0.116865	0.776716	0.899628	0.947004	0.866444	0.851891	0.856091	0.887802
cg13870866	7	35259655	TBX20	3	0.519796	0.57035	4.57759	5.78395e-05	0.0151692	1.80903	0.720611	0.200815		0.413656	0.662054	0.921531	0.565819	0.828209	0.571668	0.431009	0.836507	0.903268	0.923447	0.176307	0.150211	0.0842538	0.242419	0.173898	0.264952	0.313661	0.937329	0.0257359	0.885353	0.894538	0.939231	0.876651	0.869146	0.0628497	0.875408
cg00662556	18	73092352	GALR1	3	0.448631	0.620716	4.56544	5.99665e-05	0.0151692	1.77627	0.723677	0.275046		0.428448	0.607451	0.938824	0.604367	0.762972	0.541365	0.402855	0.901258	0.941918	0.925	0.224701	0.18623	0.127995	0.357551	0.273276	0.339113	0.416453	0.940814	0.101286	0.930352	0.950017	0.95687	0.927048	0.900997	0.519731	0.931724
cg23366752	15	76343557	DNAJA4	3	-0.520945	0.614258	-4.56317	6.03734e-05	0.0151692	1.77014	0.336828	0.857773		0.595704	0.534957	0.0281224	0.551948	0.476626	0.0484899	0.682666	0.097363	0.0386872	0.0253821	0.775987	0.851281	0.841547	0.7906	0.884984	0.956688	0.903325	0.943249	0.0355413	0.939017	0.455667	0.983066	0.733863	0.910993	0.948579	0.936377
cg26709720	21	39949830	B3GALT5	3	-0.442894	0.478664	-4.56112	6.07434e-05	0.0151692	1.76459	0.35329	0.796185		0.417454	0.298845	0.156355	0.505697	0.536714	0.211152	0.55192	0.109479	0.213831	0.389318	0.83347	0.758877	0.872058	0.755786	0.79246	0.774668	0.785974	0.785409	0.0777669	0.42899	0.525277	0.831927	0.409323	0.105036	0.170946	0.146532
cg03975694	19	42734312	ZNF540	3	0.490057	0.63198	4.55519	6.18223e-05	0.0151692	1.74862	0.752663	0.262606		0.645652	0.681511	0.956802	0.625257	0.823466	0.954482	0.40052	0.930636	0.937799	0.772325	0.337298	0.238386	0.17871	0.212356	0.251525	0.292888	0.327082	0.950536	0.0714212	0.951818	0.880436	0.969938	0.931703	0.932257	0.250066	0.926604
cg15747595	8	98359056	TSPYL5	4	0.486869	0.634165	4.51857	6.89273e-05	0.0165427	1.64995	0.787238	0.300369		0.698346	0.664237	0.947756	0.670388	0.853408	0.931794	0.499475	0.806157	0.9669	0.978479	0.252091	0.31012	0.111509	0.400434	0.281845	0.336149	0.410437	0.9537	0.0441019	0.955842	0.83584	0.81474	0.947714	0.835135	0.203951	0.777738
cg23129478	18	42591920	ST8SIA5	4	0.503253	0.471482	4.50962	7.07824e-05	0.0165427	1.62587	0.580184	0.0769305		0.0895202	0.430539	0.913383	0.372616	0.723978	0.162162	0.248464	0.831959	0.795455	0.815739	0.081398	0.0739824	0.0774634	0.101251	0.0702693	0.0740741	0.0600749	0.865749	0.0711721	0.928061	0.948833	0.744063	0.857886	0.914634	0.430289	0.575516
cg27453644	X	152643968	BCAP31	4	-0.385858	0.505355	-4.50387	7.20014e-05	0.0165427	1.61038	0.208179	0.594037		0.327048	0.287365	0.142888	0.204117	0.202611	0.1616	0.301651	0.160986	0.123818	0.123125	0.540528	0.757901	0.529327	0.384103	0.653795	0.62815	0.664452	0.951191	0.10661	0.704864	0.911155	0.918513	0.84052	0.944416	0.757832	0.810666
cg10758292	8	6824791	DEFA1	3	-0.437389	0.508382	-4.49958	7.29237e-05	0.0165427	1.59884	0.430172	0.867562		0.448589	0.408096	0.292641	0.661327	0.338172	0.313673	0.354796	0.465921	0.478065	0.423946	0.935347	0.884664	0.893796	0.827972	0.875	0.798353	0.857799	0.904886	0.0514324	0.270881	0.0788934	0.86632	0.296519	0.247072	0.132459	0.111309
cg18493147	19	425445	C19orf19	3	-0.47513	0.659109	-4.48217	7.67868e-05	0.0167203	1.55203	0.396752	0.871882		0.622465	0.704338	0.196801	0.573704	0.257872	0.0961322	0.71614	0.102722	0.238337	0.158388	0.90612	0.945124	0.823546	0.830743	0.845251	0.851542	0.900845	0.979606	0.0529731	0.952773	0.617063	0.971302	0.956842	0.9071	0.966305	0.962788
cg12265829	14	23873862	ADCY4	3	0.456364	0.508205	4.48023	7.72301e-05	0.0167203	1.54681	0.570353	0.113989		0.125888	0.648509	0.931439	0.380835	0.655911	0.176716	0.520394	0.904736	0.404227	0.561238	0.0793002	0.0655774	0.0686563	0.214849	0.0951058	0.109581	0.164853	0.908781	0.130172	0.931653	0.930442	0.957136	0.9162	0.907065	0.884943	0.53912
cg06995715	16	85170091	FOXL1	4	0.527768	0.569868	4.4774	7.7879e-05	0.0167203	1.53922	0.708199	0.180431		0.46811	0.785294	0.98167	0.330188	0.871663	0.591587	0.575398	0.982628	0.452241	0.926599	0.161629	0.124896	0.154812	0.319382	0.160461	0.134851	0.206987	0.987757	0.019743	0.789447	0.991727	0.988513	0.986029	0.204181	0.97221	0.648572
cg18239753	6	63053922	KHDRBS2	3	0.468401	0.505681	4.46593	8.05714e-05	0.0169356	1.5084	0.616955	0.148554		0.372255	0.680793	0.899559	0.613738	0.67487	0.523276	0.429151	0.540898	0.86628	0.475049	0.096036	0.09605	0.0734101	0.162928	0.114333	0.191888	0.305235	0.923247	0.0688573	0.883387	0.620184	0.953142	0.889694	0.614374	0.177606	0.90146
cg20329958	8	67252804	CRH	3	0.353702	0.494996	4.45648	8.2859e-05	0.0169356	1.48302	0.542164	0.188462		0.373421	0.567247	0.681319	0.474369	0.502964	0.669279	0.412311	0.743259	0.749583	0.375	0.18691	0.172269	0.159766	0.274862	0.182464	0.167278	0.175684	0.596561	0.0919118	0.909841	0.648069	0.870175	0.817989	0.792339	0.541129	0.733909
cg04598121	8	57521059	PENK	3	0.432081	0.547443	4.45546	8.31074e-05	0.0169356	1.4803	0.671176	0.239095		0.662076	0.569401	0.690266	0.598413	0.688368	0.762622	0.557143	0.703256	0.835712	0.735948	0.164185	0.125762	0.116525	0.360593	0.229509	0.314429	0.362663	0.883329	0.0373517	0.863629	0.517996	0.933843	0.806927	0.663462	0.227508	0.822588
cg01216369	3	174341716	SPATA16	6	-0.392518	0.668815	-4.44071	8.68164e-05	0.0172162	1.44071	0.466562	0.85908		0.703259	0.812312	0.780879	0.394803	0.323651	0.495745	0.55144	0.181118	0.182912	0.26868	0.889164	0.751566	0.894231	0.805185	0.903922	0.881696	0.887798	0.724888	0.183914	0.828917	0.887169	0.902188	0.723676	0.801964	0.798392	0.829716
cg01546563	8	11604598	GATA4	3	0.535726	0.5419	4.43865	8.73485e-05	0.0172162	1.43517	0.683851	0.148125		0.410669	0.513843	0.863395	0.461901	0.821761	0.852423	0.330598	0.935107	0.919171	0.898213	0.0956533	0.0920693	0.0874888	0.160697	0.104232	0.196186	0.300546	0.939995	0.165545	0.936582	0.655752	0.96826	0.949601	0.934807	0.0549593	0.439936
cg09137696	16	55229916	MT1A	3	0.475623	0.540991	4.41943	9.24551e-05	0.0179288	1.38366	0.63502	0.159397		0.145927	0.661684	0.944944	0.691212	0.695249	0.0768057	0.463334	0.918575	0.857962	0.336292	0.147474	0.100729	0.10551	0.23678	0.12644	0.170946	0.227897	0.924503	0.0423964	0.948868	0.947327	0.975857	0.919861	0.900007	0.592952	0.906235
cg11391732	5	53787676	HSPB3	3	-0.362598	0.63345	-4.40537	9.63789e-05	0.0182749	1.34599	0.429955	0.792554		0.48573	0.647665	0.632192	0.357965	0.396304	0.477273	0.551554	0.180766	0.185156	0.432266	0.793809	0.708238	0.77223	0.753104	0.846154	0.851772	0.82257	0.787565	0.0677376	0.916214	0.895202	0.733418	0.759569	0.699803	0.851817	0.863614
cg10660256	5	78443439	BHMT	3	0.448489	0.604729	4.40222	9.72799e-05	0.0182749	1.33755	0.671045	0.222556		0.607161	0.643915	0.965857	0.450943	0.820136	0.921574	0.36509	0.886456	0.598526	0.701321	0.138601	0.112891	0.0889192	0.314811	0.211006	0.328444	0.363219	0.973509	0.184577	0.958558	0.967368	0.970215	0.931394	0.89373	0.383227	0.941511
cg03580247	17	39701014	SLC4A1	4	-0.426352	0.522446	-4.39495	9.93898e-05	0.018384	1.3181	0.314392	0.740744		0.36751	0.295119	0.0994603	0.287146	0.390868	0.171053	0.617112	0.200948	0.129904	0.441462	0.597149	0.612756	0.720222	0.745397	0.797048	0.859103	0.853531	0.772228	0.104764	0.656435	0.548483	0.727049	0.855374	0.799679	0.13572	0.798091
cg05445326	3	197549966	TM4SF19	3	-0.404771	0.318932	-4.38693	0.000101771	0.0185394	1.29664	0.231624	0.636395		0.412868	0.317763	0.0441683	0.308424	0.135713	0.119574	0.497606	0.12385	0.111969	0.13226	0.538394	0.400133	0.644662	0.598496	0.737565	0.83544	0.700075	0.895495	0.0686642	0.291418	0.0442866	0.0552995	0.0734492	0.0580653	0.0728166	0.0737746
cg17703554	8	88955455	WDR21C	4	-0.313748	0.729492	-4.36515	0.000108524	0.0187109	1.23842	0.55574	0.869488		0.788287	0.411545	0.422703	0.775973	0.538119	0.595794	0.676033	0.354279	0.679558	0.355164	0.895319	0.820423	0.881611	0.80838	0.879568	0.913382	0.887731	0.845304	0.527221	0.842697	0.886026	0.907188	0.87914	0.745464	0.833003	0.816878
cg21624282	13	112078784	LOC122258	3	-0.528853	0.520183	-4.36407	0.000108871	0.0187109	1.23552	0.352317	0.881169		0.56853	0.398629	0.157036	0.625917	0.205278	0.139773	0.723472	0.124621	0.217237	0.150129	0.879961	0.8941	0.855505	0.814835	0.925642	0.916236	0.881904	0.917672	0.0636994	0.499816	0.0835273	0.939429	0.881131	0.161768	0.137381	0.36154
cg11981599	8	11603935	GATA4	3	0.398285	0.554979	4.36276	0.000109291	0.0187109	1.23203	0.632943	0.234658		0.487978	0.616248	0.598878	0.560632	0.643829	0.617276	0.406755	0.886166	0.721717	0.774288	0.228806	0.162378	0.114444	0.279482	0.228451	0.300055	0.32899	0.932081	0.45498	0.875985	0.829227	0.956357	0.897579	0.796922	0.18692	0.54304
cg23130254	2	176672834	HOXD12	3	0.488216	0.576369	4.3602	0.00011012	0.0187109	1.22518	0.694283	0.206067		0.527283	0.576909	0.89783	0.546284	0.82048	0.823979	0.42497	0.800849	0.759988	0.893955	0.16981	0.144422	0.0714595	0.257704	0.210309	0.272516	0.316247	0.904805	0.0325688	0.955709	0.869161	0.975626	0.930275	0.823731	0.0908876	0.887838
cg24423088	21	31107236	KRTAP8-1	4	-0.538149	0.516517	-4.35905	0.000110494	0.0187109	1.22211	0.382489	0.920638		0.436174	0.431505	0.0478308	0.610229	0.668118	0.112284	0.592052	0.0850904	0.113883	0.457521	0.909181	0.934056	0.948508	0.855803	0.948702	0.935153	0.913066	0.939372	0.0429876	0.511445	0.0641899	0.956262	0.144248	0.0390333	0.107838	0.624901
cg09099744	9	21958372	CDKN2A	3	0.413728	0.557358	4.35206	0.000112794	0.018835	1.20344	0.523731	0.110003		0.434741	0.587306	0.965892	0.50461	0.151871	0.943102	0.090841	0.480583	0.923872	0.573864	0.0611761	0.0737214	0.0591657	0.152534	0.0739005	0.151645	0.197877	0.97736	0.545496	0.967035	0.954851	0.96475	0.950717	0.957789	0.769069	0.977539
cg25596297	2	222871119	FLJ32447	5	0.449992	0.570093	4.32984	0.000120421	0.0198331	1.14415	0.656412	0.20642		0.57235	0.594142	0.869799	0.497721	0.802878	0.890285	0.26801	0.744672	0.795082	0.76305	0.280769	0.219876	0.25578	0.238651	0.150253	0.148945	0.150665	0.784264	0.1231	0.924258	0.940741	0.929769	0.858928	0.904816	0.19284	0.920774
cg23563234	5	140777470	PCDHGB7	3	0.458141	0.49975	4.31774	0.000124786	0.0202743	1.11189	0.624765	0.166624		0.542558	0.588595	0.954826	0.475142	0.542991	0.772104	0.398831	0.895355	0.862355	0.362232	0.22819	0.153846	0.134089	0.159911	0.145532	0.163121	0.18168	0.900177	0.173093	0.557489	0.93033	0.347783	0.930877	0.780042	0.209095	0.603249
cg19456540	14	60046038	SIX6	5	0.506649	0.568095	4.31048	0.000127478	0.0204194	1.09255	0.619063	0.112413		0.138868	0.811849	0.961797	0.672132	0.563708	0.595182	0.459865	0.852589	0.949974	0.160782	0.0333488	0.0429335	0.0410396	0.133066	0.128401	0.183592	0.224514	0.980787	0.890256	0.920355	0.973613	0.992592	0.972147	0.977967	0.127105	0.982001
cg20584011	5	904422	ZDHHC11	3	-0.443773	0.53977	-4.29416	0.000133742	0.0204194	1.0491	0.328342	0.772115		0.414682	0.706962	0.373378	0.476462	0.233275	0.0923267	0.505752	0.0872075	0.105543	0.0518154	0.702287	0.732131	0.740118	0.764531	0.842012	0.847475	0.776253	0.943519	0.0490685	0.719264	0.499305	0.962024	0.463175	0.604261	0.659658	0.681536
cg17793621	15	23659177	ATP10A	3	0.515414	0.456477	4.29407	0.000133778	0.0204194	1.04885	0.585723	0.0703091		0.271831	0.63955	0.744056	0.447683	0.783598	0.441733	0.276669	0.467261	0.736116	0.904741	0.0504839	0.0516963	0.0428671	0.131098	0.0417676	0.0803302	0.0939206	0.909997	0.0481642	0.912255	0.78554	0.0880799	0.906221	0.907461	0.198296	0.906981
cg03238797	16	76026394	ADAMTS18	5	0.515769	0.522406	4.29307	0.00013417	0.0204194	1.0462	0.645227	0.129458		0.11067	0.624002	0.936411	0.661611	0.816713	0.532056	0.377059	0.507849	0.93108	0.841648	0.0717585	0.042734	0.0363867	0.183237	0.115354	0.197733	0.259002	0.939042	0.0356314	0.949643	0.888164	0.947904	0.899507	0.88735	0.122999	0.667019
cg07239938	19	803813	ELA2	3	-0.390306	0.411254	-4.26127	0.000147297	0.022137	0.961657	0.117344	0.50765		0.307588	0.140513	0.026951	0.177887	0.0809923	0.113033	0.127878	0.0674311	0.0744287	0.0524288	0.459149	0.430429	0.478605	0.430647	0.535103	0.571855	0.647764	0.964996	0.0482237	0.960778	0.773742	0.566188	0.771879	0.768935	0.637792	0.477384
cg18884741	7	65842232	RABGEF1	3	-0.382686	0.631737	-4.25532	0.000149891	0.0222062	0.94585	0.409451	0.792137		0.570295	0.617087	0.751756	0.36615	0.274256	0.368557	0.485235	0.279821	0.176915	0.163543	0.776838	0.638614	0.825873	0.726368	0.856925	0.85406	0.866279	0.805994	0.112132	0.942554	0.949525	0.928514	0.765268	0.876163	0.585714	0.860725
cg14062083	21	30724700	KRTAP13-4	3	-0.385633	0.493543	-4.24328	0.000155271	0.0222062	0.913916	0.393526	0.779159		0.605849	0.608932	0.298091	0.507524	0.278901	0.349171	0.520498	0.268109	0.271772	0.18206	0.780775	0.771831	0.774577	0.731434	0.790956	0.809956	0.794585	0.802254	0.131176	0.23566	0.386967	0.737855	0.45619	0.116909	0.123281	0.496815
cg06675478	13	111769787	SOX1	4	0.402389	0.659935	4.239	0.00015723	0.0222062	0.902562	0.755281	0.352892		0.550407	0.639094	0.973372	0.512404	0.740402	0.598543	0.592607	0.936621	0.960884	0.891738	0.321973	0.156758	0.202472	0.449681	0.38783	0.476516	0.475014	0.932358	0.0744519	0.960069	0.937122	0.978129	0.931413	0.936792	0.605362	0.936294
cg25007250	7	150318645	NOS3	3	-0.413345	0.509826	-4.23451	0.000159314	0.0222062	0.890638	0.463688	0.877033		0.52488	0.541295	0.267561	0.641423	0.529875	0.245142	0.549914	0.0769912	0.420095	0.621157	0.866461	0.818268	0.91192	0.85236	0.885184	0.914187	0.890848	0.923664	0.0780788	0.0970454	0.136087	0.667933	0.256556	0.109308	0.108036	0.321203
cg07711097	8	143912956	GML	3	-0.505094	0.467732	-4.23316	0.000159943	0.0222062	0.88707	0.236352	0.741446		0.385988	0.303497	0.0616346	0.257444	0.250445	0.0880657	0.603886	0.0842432	0.0511152	0.128915	0.641446	0.791055	0.732707	0.591329	0.771194	0.844902	0.817488	0.932241	0.02854	0.731366	0.336479	0.949797	0.932443	0.161488	0.0883019	0.595024
cg11113534	20	31219685	C20orf70	3	-0.502525	0.535959	-4.23292	0.000160056	0.0222062	0.886433	0.386994	0.889519		0.582265	0.556437	0.186551	0.444933	0.255341	0.286139	0.719479	0.283444	0.151383	0.303114	0.912491	0.894354	0.914714	0.7933	0.910674	0.915039	0.886058	0.930375	0.0792638	0.770665	0.096569	0.947194	0.713106	0.166498	0.137511	0.0980474
cg13282837	14	95250401	TCL1A	4	0.490013	0.692935	4.23158	0.000160687	0.0222062	0.882872	0.859012	0.369		0.782721	0.709835	0.955679	0.76456	0.886589	0.983916	0.723036	0.962236	0.973902	0.972552	0.499084	0.558597	0.335166	0.394272	0.338463	0.215148	0.242269	0.968427	0.0298003	0.981841	0.983587	0.992287	0.969711	0.97351	0.0915217	0.727613
cg01381846	7	27171310	HOXA9	3	0.441068	0.578684	4.20624	0.000173052	0.0236123	0.815755	0.724893	0.283825		0.748076	0.789603	0.888894	0.681896	0.742144	0.870169	0.545333	0.696123	0.722441	0.709529	0.178537	0.208067	0.151315	0.275599	0.303464	0.422855	0.446936	0.883037	0.0844034	0.857348	0.916882	0.808402	0.846897	0.817043	0.261753	0.189034
cg17241310	1	90955444	BARHL2	4	0.464111	0.592895	4.20282	0.00017479	0.0236123	0.80671	0.696416	0.232304		0.464579	0.653394	0.953504	0.662322	0.824526	0.814597	0.244219	0.624859	0.907535	0.932802	0.190989	0.179332	0.355849	0.252045	0.168629	0.229935	0.249353	0.949428	0.0360838	0.952471	0.969106	0.957013	0.941328	0.945292	0.395477	0.560616
cg02028524	14	91643163	ATXN3	3	-0.392596	0.653265	-4.1981	0.000177219	0.0236745	0.794214	0.437725	0.830321		0.543689	0.57984	0.164806	0.380914	0.660097	0.135112	0.702781	0.392461	0.181395	0.333545	0.786587	0.817862	0.852264	0.724589	0.903686	0.896137	0.831122	0.898784	0.100062	0.946225	0.939681	0.96716	0.625744	0.933052	0.819969	0.867315
cg20008332	2	5750620	SOX11	5	0.478252	0.539741	4.169	0.00019294	0.0253666	0.71729	0.626726	0.148474		0.637068	0.495864	0.901529	0.344155	0.752374	0.90417	0.299379	0.755513	0.638661	0.815993	0.119024	0.0652959	0.0363964	0.174114	0.161495	0.228904	0.25409	0.936694	0.0480302	0.903198	0.896529	0.906205	0.919036	0.850944	0.106111	0.882495
cg17797815	10	119796962	RAB11FIP2	3	-0.421606	0.411951	-4.16693	0.000194105	0.0253666	0.71184	0.231221	0.652828		0.36472	0.435941	0.0920149	0.219869	0.160392	0.0840774	0.42283	0.14955	0.0941771	0.141499	0.589047	0.604045	0.642096	0.586853	0.724968	0.701047	0.721739	0.871593	0.060032	0.363115	0.364025	0.844693	0.176865	0.303022	0.217947	0.774581
cg01354473	7	27171328	HOXA9	4	0.487036	0.568088	4.13854	0.000210853	0.027259	0.636957	0.718411	0.231375		0.756282	0.763936	0.952523	0.621321	0.649469	0.928067	0.484117	0.676597	0.90627	0.655187	0.142527	0.0698679	0.14757	0.307319	0.214721	0.357349	0.380275	0.923994	0.0473555	0.826936	0.942325	0.831301	0.90064	0.933137	0.275	0.0761969
cg13038560	2	200527358	FLJ22555	3	-0.43229	0.550985	-4.12847	0.000217127	0.0277715	0.61043	0.39586	0.828149		0.487304	0.41285	0.388097	0.503245	0.202792	0.223043	0.692462	0.440054	0.265222	0.170711	0.800895	0.766876	0.834695	0.757576	0.897563	0.891423	0.848018	0.857051	0.165134	0.222628	0.852652	0.697347	0.792581	0.247232	0.12815	0.780016
cg14757296	3	50324922	HYAL1	3	-0.261394	0.688621	-4.10632	0.000231577	0.0293079	0.552153	0.57833	0.839724		0.589402	0.618408	0.651284	0.557572	0.507031	0.573279	0.685454	0.586255	0.524151	0.485415	0.801104	0.805486	0.84853	0.816633	0.847553	0.889145	0.869617	0.883778	0.384175	0.712328	0.749476	0.706921	0.622212	0.692952	0.732363	0.76362
cg15842276	11	92342296	MTNR1B	3	0.34211	0.730469	4.10127	0.000235	0.0294313	0.538881	0.786193	0.444084		0.620371	0.656114	0.954748	0.676712	0.852062	0.940446	0.561814	0.94696	0.920056	0.886902	0.42066	0.436984	0.254277	0.490041	0.460534	0.524966	0.521123	0.949086	0.924223	0.950566	0.954844	0.968545	0.939641	0.919753	0.321657	0.939117
cg03776850	16	1246873	TPSD1	3	-0.373225	0.760731	-4.09517	0.000239199	0.0294459	0.522864	0.556543	0.929768		0.752342	0.676509	0.711559	0.665325	0.516984	0.243166	0.794805	0.401057	0.430432	0.0598756	0.92706	0.952008	0.894184	0.890543	0.954108	0.955606	0.934865	0.980942	0.412383	0.984386	0.80306	0.982892	0.968286	0.918121	0.984846	0.983666
cg21907579	12	113330251	TBX5	4	0.4468	0.536734	4.094	0.000240015	0.0294459	0.519788	0.607062	0.160261		0.52222	0.503831	0.872306	0.482231	0.754051	0.876923	0.23029	0.298852	0.900805	0.898969	0.1327	0.135119	0.0919815	0.263633	0.11255	0.179054	0.206794	0.884601	0.0618224	0.937736	0.8588	0.915865	0.864001	0.849047	0.338698	0.782203
cg08047907	1	167663482	C1orf114	4	0.484861	0.502597	4.07149	0.000256216	0.0310727	0.460725	0.553044	0.0681831		0.558195	0.272212	0.763338	0.480731	0.415503	0.92528	0.419284	0.887594	0.914021	0.266522	0.0743595	0.0614391	0.040772	0.0979806	0.0659496	0.0617808	0.075	0.960496	0.127909	0.968957	0.966011	0.973411	0.96055	0.911301	0.0899431	0.728976
cg10127415	X	26120444	MAGEB6	3	-0.46463	0.366989	-4.06851	0.000258444	0.0310727	0.452897	0.217514	0.682144		0.351486	0.285116	0.0368117	0.30495	0.144675	0.145174	0.558108	0.13326	0.0733775	0.0698381	0.789488	0.743161	0.824788	0.616766	0.582532	0.645878	0.572391	0.940385	0.05	0.120078	0.0614707	0.956806	0.269322	0.0404676	0.0669442	0.158425
cg12125117	16	56258962	GPR97	3	-0.369312	0.655294	-4.06177	0.000263537	0.0313713	0.435254	0.441279	0.81059		0.284123	0.637516	0.684288	0.478157	0.486617	0.0318845	0.459846	0.209182	0.314217	0.417561	0.729783	0.902484	0.785865	0.745513	0.846354	0.868404	0.795729	0.914039	0.0249126	0.932398	0.953883	0.957946	0.955794	0.846412	0.845883	0.928852
cg21142398	1	53972666	GLIS1	4	-0.303857	0.56942	-4.05334	0.000270057	0.0313887	0.413161	0.375789	0.679646		0.333646	0.367113	0.267148	0.532383	0.233004	0.260181	0.540481	0.434856	0.426644	0.246827	0.591592	0.550989	0.625405	0.613746	0.791624	0.818374	0.765791	0.733728	0.278071	0.860132	0.787521	0.87872	0.848344	0.784476	0.603935	0.630191
cg19910382	2	88208676	FABP1	3	-0.473911	0.514422	-4.05136	0.000271607	0.0313887	0.407989	0.364684	0.838595		0.385677	0.408451	0.107336	0.636489	0.27162	0.221795	0.679889	0.154604	0.387182	0.250912	0.892348	0.866461	0.794295	0.746386	0.892833	0.856322	0.821522	0.915188	0.0538336	0.325028	0.146632	0.959937	0.90985	0.188414	0.123349	0.378626
cg25044651	5	115326619	FLJ90650	3	0.441115	0.636082	4.05085	0.000272013	0.0313887	0.406638	0.725594	0.284479		0.196562	0.61194	0.957946	0.578063	0.841474	0.0594251	0.506832	0.940663	0.960117	0.936746	0.341855	0.176434	0.190342	0.333607	0.23412	0.34843	0.366566	0.95999	0.871336	0.968416	0.932727	0.971546	0.942233	0.94902	0.547333	0.8144
cg04623837	6	30051393	HCG9	7	0.419816	0.58402	4.04818	0.000274126	0.0313887	0.399644	0.651504	0.231688		0.0770768	0.621404	0.908435	0.496609	0.762592	0.0802895	0.368951	0.894001	0.885763	0.848702	0.384922	0.357815	0.149807	0.29722	0.18642	0.113656	0.131973	0.887683	0.444608	0.916179	0.942275	0.940221	0.873088	0.949392	0.747023	0.918406
cg12619162	10	43187161	FXYD4	3	-0.486872	0.483105	-4.04448	0.000277076	0.0314272	0.389968	0.260882	0.747754		0.35586	0.285533	0.0459418	0.342278	0.358777	0.0786122	0.576807	0.0484812	0.235249	0.0990073	0.747216	0.853165	0.781268	0.557021	0.774138	0.758707	0.762759	0.938393	0.032759	0.309363	0.596595	0.968347	0.914078	0.125449	0.156739	0.858195
cg15761233	2	200527315	FLJ22555	3	-0.328214	0.545708	-4.03918	0.000281358	0.0315719	0.376107	0.411165	0.739379		0.489881	0.44188	0.311024	0.510851	0.308987	0.342155	0.573306	0.35823	0.357418	0.348907	0.63422	0.76	0.75707	0.726485	0.727515	0.826736	0.743627	0.770619	0.166023	0.584877	0.583333	0.658706	0.777825	0.288523	0.330827	0.809391
cg20449692	3	171619614	CLDN11	5	0.40957	0.573093	4.03643	0.000283604	0.0315719	0.368922	0.59588	0.186309		0.0661791	0.711214	0.779254	0.484031	0.613469	0.0187878	0.555139	0.955378	0.546459	0.651796	0.109579	0.108855	0.0885115	0.268777	0.175768	0.265312	0.287363	0.989729	0.530253	0.994102	0.991108	0.993792	0.980653	0.984061	0.764158	0.986693
cg20191453	3	49434859	AMT	4	-0.409314	0.633005	-4.01156	0.00030475	0.0335704	0.303938	0.36169	0.771004		0.423389	0.503389	0.627561	0.23513	0.565479	0.0756341	0.605823	0.0957917	0.126793	0.0718508	0.875437	0.92173	0.698297	0.760793	0.702203	0.66923	0.769337	0.978466	0.030407	0.980034	0.979538	0.977496	0.961463	0.963323	0.899903	0.959636
cg03330516	20	61649188	SRMS	3	-0.398359	0.56342	-4.00636	0.000309363	0.0335704	0.290367	0.31955	0.71791		0.433151	0.474996	0.244569	0.374933	0.197556	0.0513181	0.668037	0.397808	0.0464108	0.038491	0.719666	0.733042	0.638915	0.659103	0.772198	0.741059	0.761385	0.92856	0.0541623	0.876787	0.921288	0.937279	0.916344	0.613578	0.638087	0.810188
cg25148589	4	158361386	GRIA2	3	0.362993	0.652393	4.00403	0.000311452	0.0335704	0.284285	0.713776	0.350783		0.620298	0.6316	0.825425	0.611416	0.707664	0.779428	0.438687	0.944542	0.936547	0.707805	0.387829	0.364913	0.223522	0.401931	0.325491	0.35235	0.399446	0.946695	0.538663	0.940046	0.936781	0.959104	0.900607	0.908734	0.227296	0.945388
cg08300860	10	88418237	LDB3	4	-0.482847	0.549782	-4.00261	0.000312724	0.0335704	0.280602	0.357161	0.840009		0.516836	0.437796	0.119341	0.434028	0.321273	0.0473798	0.787893	0.342007	0.165762	0.0895132	0.812828	0.891846	0.719245	0.819312	0.898689	0.868265	0.869875	0.962754	0.0477629	0.660102	0.202519	0.633691	0.943384	0.642258	0.108386	0.951583
cg05823029	13	113360759	ATP4B	3	-0.429187	0.579279	-3.99225	0.000322221	0.0341339	0.253577	0.37318	0.802368		0.507349	0.675891	0.422185	0.474555	0.361746	0.0277648	0.675966	0.118267	0.0296856	0.0929787	0.832658	0.881752	0.759187	0.802919	0.802157	0.779796	0.758105	0.958132	0.0234549	0.763656	0.686717	0.906565	0.934633	0.578791	0.527579	0.678775
cg19172575	8	11605130	GATA4	3	0.412928	0.648049	3.99071	0.000323652	0.0341339	0.249576	0.736888	0.323959		0.614538	0.558074	0.545487	0.712488	0.869497	0.865261	0.508693	0.933091	0.946313	0.943808	0.287959	0.220778	0.204321	0.386842	0.337726	0.399643	0.430446	0.93397	0.387519	0.94237	0.942252	0.968887	0.9093	0.945197	0.11369	0.941123
cg04457979	11	2847223	KCNQ1DN	5	0.371659	0.565742	3.97974	0.000334052	0.0347596	0.221007	0.601092	0.229433		0.54792	0.581989	0.806424	0.602032	0.816109	0.703845	0.384192	0.495181	0.484828	0.691153	0.28811	0.19309	0.199667	0.239298	0.228132	0.1862	0.271535	0.950655	0.0329537	0.975291	0.89924	0.957301	0.926902	0.922291	0.464124	0.860837
cg24975842	20	56849616	GNAS	5	0.319524	0.762519	3.97838	0.000335367	0.0347596	0.21746	0.82621	0.506686		0.735354	0.707171	0.989624	0.646249	0.883712	0.9575	0.645621	0.987668	0.967748	0.872743	0.522814	0.52121	0.446829	0.471781	0.548499	0.512234	0.523434	0.976248	0.619791	0.982924	0.944903	0.986031	0.980153	0.979739	0.430141	0.985361
cg25720804	5	170668994	TLX3	6	0.502243	0.590517	3.97205	0.000341537	0.0350966	0.200996	0.744929	0.242686		0.723061	0.687484	0.920265	0.685134	0.691083	0.836613	0.556859	0.874191	0.877185	0.689098	0.125367	0.0584278	0.0697283	0.331161	0.282008	0.391537	0.440573	0.962904	0.0525693	0.976189	0.980356	0.0335515	0.968499	0.96242	0.196336	0.980854
cg22082462	14	23610255	CPNE6	4	-0.332318	0.550901	-3.96465	0.000348902	0.0353084	0.181729	0.375848	0.708166		0.434201	0.40266	0.306869	0.448829	0.255491	0.228414	0.422974	0.487578	0.306818	0.31721	0.726961	0.637911	0.763994	0.695623	0.772746	0.700776	0.659149	0.818401	0.162102	0.580968	0.61117	0.922967	0.884748	0.632743	0.326071	0.816045
cg12799895	7	98084588	NPTX2	6	0.381848	0.629502	3.96408	0.000349472	0.0353084	0.180255	0.690746	0.308898		0.508167	0.673342	0.969361	0.603498	0.658386	0.632569	0.529337	0.852635	0.945885	0.476104	0.265362	0.185105	0.11165	0.403857	0.387339	0.31831	0.490666	0.970308	0.0634692	0.983859	0.814634	0.986184	0.965434	0.956946	0.660183	0.954462
cg19358442	11	44282263	ALX4	4	0.428074	0.517442	3.96011	0.000353487	0.0354164	0.169941	0.595123	0.167049		0.504458	0.338199	0.461676	0.515933	0.641711	0.59848	0.365196	0.970957	0.800139	0.75784	0.148155	0.0873884	0.315001	0.169571	0.120145	0.11986	0.209223	0.982192	0.0302832	0.979543	0.714278	0.982226	0.970234	0.817799	0.412264	0.440746
cg02955504	18	75850362	TXNL4A	4	-0.311307	0.579548	-3.94008	0.000374454	0.0372071	0.117917	0.415158	0.726465		0.410914	0.485511	0.326221	0.539732	0.295198	0.285714	0.560029	0.399044	0.380747	0.339024	0.707733	0.749048	0.676452	0.664865	0.781721	0.722343	0.783094	0.812383	0.205527	0.463374	0.781537	0.753029	0.848558	0.80274	0.450737	0.842979
cg03789934	19	61034477	NALP11	3	-0.301498	0.297706	-3.93274	0.000382428	0.0374986	0.0988979	0.225836	0.527333		0.355525	0.261046	0.0983832	0.264003	0.145471	0.253933	0.45662	0.165414	0.152637	0.133422	0.458385	0.638401	0.494788	0.416153	0.6186	0.566597	0.498409	0.787812	0.0762826	0.120868	0.0948808	0.101601	0.146947	0.124847	0.149958	0.159384
cg13912117	8	132123737	ADCY8	5	0.531031	0.548609	3.93166	0.000383625	0.0374986	0.0960754	0.651729	0.120698		0.678064	0.777008	0.982075	0.631407	0.49378	0.961848	0.504698	0.8465	0.928343	0.0236903	0.0433007	0.0259222	0.0279381	0.255111	0.112036	0.193771	0.186808	0.982777	0.0159289	0.98989	0.984343	0.977642	0.976752	0.963934	0.0210779	0.679183
cg13434842	8	11605305	GATA4	6	0.402574	0.685041	3.92501	0.000391015	0.0379127	0.0788549	0.777853	0.375279		0.510908	0.72531	0.925654	0.633752	0.864455	0.566089	0.496946	0.946315	0.939674	0.957664	0.323443	0.250727	0.156131	0.517817	0.391398	0.496206	0.491231	0.931708	0.846289	0.952861	0.962451	0.979373	0.943488	0.933135	0.124261	0.943776
cg23290344	8	24827371	NEF3	6	0.43174	0.57369	3.91855	0.000398339	0.0383138	0.0621067	0.671335	0.239595		0.668353	0.669112	0.886326	0.658724	0.627005	0.740439	0.528369	0.751409	0.652672	0.600048	0.182868	0.149021	0.0766099	0.371183	0.215733	0.300658	0.381092	0.958819	0.130261	0.975527	0.542391	0.978236	0.939261	0.93124	0.0407786	0.959813
cg04875162	X	90576482	PABPC5	3	0.425387	0.59694	3.90051	0.00041949	0.040028	0.015423	0.694206	0.268819		0.686147	0.688474	0.887526	0.696252	0.773732	0.893277	0.381859	0.789152	0.876203	0.46851	0.146954	0.234869	0.101836	0.350485	0.252722	0.402968	0.3919	0.916332	0.135356	0.908071	0.852444	0.956544	0.908497	0.812627	0.104436	0.903259
cg03365437	15	56145166	ALDH1A2	3	0.444113	0.567182	3.89372	0.000427727	0.0400776	-0.0021224	0.650283	0.20617		0.527785	0.633469	0.878728	0.613169	0.612828	0.927119	0.465421	0.443233	0.958647	0.719263	0.128779	0.11737	0.0766558	0.258931	0.215398	0.321547	0.324507	0.92784	0.0463369	0.92628	0.728817	0.974464	0.941264	0.902571	0.111758	0.964539
cg26309134	19	61571383	ZNF542	4	0.547527	0.487814	3.89291	0.000428719	0.0400776	-0.00421091	0.596544	0.0490173		0.0754599	0.754573	0.983966	0.65882	0.557554	0.0396934	0.365167	0.949732	0.963161	0.0604666	0.0290639	0.0428312	0.0333545	0.0973137	0.0470178	0.0393781	0.0541616	0.967729	0.0369305	0.988749	0.975974	0.988052	0.963658	0.96987	0.0705688	0.969914
cg04544154	X	129073190	ELF4	3	-0.51479	0.372975	-3.89186	0.00043001	0.0400776	-0.00692453	0.198608	0.713398		0.302506	0.251866	0.039723	0.219106	0.125433	0.0572727	0.634452	0.0766844	0.0720695	0.065636	0.457914	0.858676	0.498306	0.578231	0.825163	0.920521	0.854978	0.970552	0.0315926	0.0292185	0.0252809	0.0351834	0.7033	0.964463	0.0443922	0.0548217
cg01962826	6	34208945	GRM4	3	-0.436073	0.639543	-3.88022	0.000444573	0.0409803	-0.0369681	0.470933	0.907006		0.474001	0.613774	0.338048	0.692989	0.138998	0.317035	0.734817	0.499135	0.654264	0.0923702	0.901187	0.911721	0.900711	0.875238	0.929141	0.922572	0.908471	0.916491	0.0699164	0.893258	0.054029	0.943293	0.648235	0.653441	0.821624	0.72336
cg13954572	6	167718534	TCP10	3	-0.382471	0.618926	-3.8787	0.000446512	0.0409803	-0.0408932	0.350178	0.732649		0.75928	0.507232	0.349239	0.404322	0.143629	0.825909	0.578342	0.13955	0.122227	0.147777	0.790149	0.834946	0.749923	0.70657	0.707017	0.672367	0.66757	0.919484	0.0589929	0.901728	0.814461	0.931637	0.915377	0.643121	0.904159	0.897061
cg01215061	X	89063596	TGIF2LX	3	-0.366893	0.576155	-3.87532	0.000450849	0.0410648	-0.049612	0.430358	0.797251		0.598817	0.44225	0.163926	0.642984	0.431971	0.303872	0.553635	0.321921	0.315977	0.401736	0.768285	0.879103	0.776639	0.737654	0.773696	0.820896	0.824483	0.829006	0.146839	0.47686	0.172507	0.798248	0.656466	0.448494	0.759652	0.934106
cg05521696	12	7916762	SLC2A14	3	0.384212	0.525722	3.87232	0.000454741	0.0411079	-0.0573638	0.534543	0.150331		0.449405	0.704618	0.941458	0.46854	0.399247	0.63368	0.439574	0.599518	0.596826	0.2117	0.135593	0.093638	0.106616	0.161605	0.151451	0.169634	0.233778	0.961773	0.0820272	0.956652	0.953669	0.980781	0.944587	0.896644	0.443929	0.951841
cg14726637	1	205735931	CR1	3	0.345259	0.558058	3.86859	0.000459616	0.0412386	-0.0669813	0.548106	0.202847		0.490136	0.568558	0.920746	0.464168	0.499416	0.768265	0.364703	0.601893	0.834322	0.189009	0.217678	0.305662	0.158643	0.183573	0.217994	0.139316	0.197063	0.913353	0.511501	0.915578	0.937924	0.96618	0.918428	0.894871	0.422708	0.907831
cg22190114	19	61151046	NALP8	3	-0.38778	0.552276	-3.86052	0.000470336	0.0418877	-0.0877714	0.489917	0.877697		0.464329	0.545455	0.424724	0.73674	0.223928	0.432274	0.605927	0.3893	0.634146	0.384706	0.857379	0.81436	0.898686	0.835809	0.943335	0.9096	0.884711	0.901115	0.0726839	0.888377	0.118829	0.519045	0.294596	0.14105	0.176054	0.262023
cg26521404	7	27171506	HOXA9	9	0.47029	0.6256	3.85671	0.000475483	0.0420348	-0.0975868	0.765627	0.295337		0.776746	0.742167	0.991231	0.677228	0.692222	0.993648	0.610139	0.741811	0.987125	0.671972	0.235718	0.127996	0.0623862	0.426812	0.282439	0.462854	0.469153	0.990229	0.0144928	0.800435	0.993653	0.85684	0.983677	0.987462	0.66168	0.0254917
cg26186727	18	68685514	NETO1	3	0.448837	0.604766	3.84919	0.000485806	0.0424036	-0.116952	0.723247	0.274411		0.590464	0.645941	0.955029	0.577383	0.776666	0.836416	0.50382	0.859703	0.967897	0.632322	0.190745	0.168828	0.0822958	0.391251	0.302572	0.362184	0.422998	0.944895	0.0449783	0.947534	0.961711	0.978612	0.931975	0.625991	0.0762573	0.945452
cg18555440	11	17698263	MYOD1	3	0.452696	0.567089	3.84854	0.000486709	0.0424036	-0.118626	0.666464	0.213768		0.464484	0.568633	0.937621	0.499206	0.737143	0.547806	0.435417	0.939104	0.881611	0.534958	0.195754	0.134814	0.0599769	0.281857	0.160116	0.312324	0.351537	0.954429	0.0338198	0.950774	0.943433	0.969451	0.950967	0.905686	0.0536133	0.939779
cg07730329	5	140790321	PCDHGA12	4	0.358052	0.497065	3.83125	0.000511321	0.0442274	-0.163096	0.531072	0.17302		0.482496	0.499545	0.893839	0.359333	0.53507	0.774943	0.399967	0.674373	0.596595	0.338429	0.291511	0.198536	0.184822	0.143867	0.144882	0.132729	0.114796	0.843927	0.0993854	0.873926	0.930275	0.695629	0.884089	0.388171	0.816824	0.625728
cg22334665	6	110904190	SLC22A16	3	0.370877	0.442416	3.82669	0.000518006	0.0443264	-0.174803	0.421563	0.0506861		0.396063	0.395509	0.472419	0.188448	0.70382	0.634618	0.18289	0.197932	0.345934	0.911055	0.0435784	0.0480764	0.0343472	0.0547105	0.0539747	0.0559668	0.0641486	0.923946	0.0673769	0.827085	0.783201	0.965269	0.813103	0.698114	0.87207	0.769159
cg06825142	11	627170	DRD4	3	0.439709	0.480037	3.82545	0.000519839	0.0443264	-0.177987	0.526049	0.0863402		0.0780779	0.722343	0.899336	0.484796	0.530826	0.0414549	0.464238	0.808444	0.712271	0.0341081	0.0547752	0.0373103	0.035104	0.12212	0.0914386	0.136463	0.127171	0.937557	0.0446869	0.947674	0.944424	0.965709	0.931293	0.946158	0.523778	0.859416
cg15479752	19	40632702	FFAR2	3	-0.448515	0.510553	-3.82036	0.000527425	0.0446565	-0.191043	0.303058	0.751573		0.588346	0.476824	0.0611573	0.396435	0.236333	0.16488	0.715452	0.128574	0.0599939	0.064406	0.607974	0.615119	0.769416	0.673442	0.81519	0.921797	0.858073	0.934036	0.0497621	0.604733	0.150628	0.454312	0.892363	0.387805	0.888676	0.758649
cg00767581	2	176723371	HOXD4	4	0.404935	0.651372	3.81528	0.000535114	0.0449907	-0.204086	0.786278	0.381343		0.570349	0.766667	0.944895	0.608198	0.864331	0.485444	0.577583	0.929173	0.925045	0.890266	0.484742	0.366287	0.442683	0.396664	0.304548	0.326123	0.348357	0.963903	0.168279	0.971486	0.913876	0.97309	0.929447	0.93518	0.0852683	0.763791
cg13877915	19	63643484	ZNF132	4	0.499404	0.443584	3.8127	0.000539059	0.0450077	-0.210705	0.564021	0.0646167		0.0408573	0.639548	0.877248	0.742684	0.331154	0.0695343	0.433937	0.874906	0.907237	0.228614	0.0703518	0.0974383	0.0445633	0.0530047	0.0458207	0.0763378	0.0648001	0.927993	0.0729797	0.957183	0.597453	0.917629	0.953714	0.901544	0.0457018	0.560955
cg25764191	10	105027205	INA	4	0.452712	0.444326	3.79592	0.000565405	0.0468818	-0.253697	0.536059	0.0833465		0.141735	0.498315	0.592675	0.628882	0.767832	0.0477394	0.480952	0.650166	0.56783	0.496144	0.102778	0.0756788	0.0345025	0.0712032	0.0431141	0.118017	0.138132	0.96452	0.0381674	0.973196	0.392029	0.767041	0.954509	0.952836	0.0795378	0.97495
cg03854071	19	19487428	NDUFA13	3	-0.409111	0.724871	-3.79118	0.000573073	0.0471922	-0.265831	0.520732	0.929844		0.67109	0.782538	0.866085	0.588494	0.330712	0.094407	0.837892	0.391419	0.169622	0.0487382	0.92531	0.919764	0.888583	0.913567	0.957418	0.948948	0.955317	0.926511	0.0301925	0.963335	0.960755	0.930484	0.947271	0.932054	0.904024	0.962116
cg04272086	18	48121357	DCC	4	0.458015	0.446547	3.77907	0.000593124	0.0485111	-0.296808	0.591503	0.133488		0.449293	0.570539	0.899718	0.404585	0.627053	0.859239	0.240984	0.358839	0.860391	0.912123	0.0689515	0.0749554	0.0413589	0.173061	0.12027	0.230711	0.225107	0.938825	0.0361705	0.945662	0.586847	0.509346	0.853079	0.178197	0.151612	0.293299
cg10722799	21	34963569	CLIC6	4	0.397239	0.639053	3.77365	0.000602313	0.0489298	-0.310653	0.750287	0.353048		0.510501	0.634631	0.942535	0.631384	0.826159	0.570169	0.548157	0.933547	0.93594	0.789729	0.570266	0.593429	0.256353	0.494946	0.31374	0.0587671	0.183838	0.928097	0.0469911	0.931223	0.955249	0.956288	0.908357	0.88175	0.370365	0.842977
cg02649337	X	148671471	MAGEA9	3	-0.326689	0.768686	-3.75631	0.000632676	0.0499384	-0.354935	0.61163	0.938319		0.65391	0.938772	0.881822	0.607594	0.470743	0.539579	0.790593	0.365211	0.22096	0.575067	0.973376	0.977415	0.956369	0.926777	0.931689	0.8974	0.905207	0.950324	0.490119	0.89948	0.755269	0.975606	0.905269	0.655271	0.793988	0.948028
cg19352038	2	222873113	PAX3	4	0.332633	0.656104	3.7544	0.000636099	0.0499384	-0.359792	0.700607	0.367974		0.445033	0.637341	0.897959	0.568757	0.854882	0.705064	0.406617	0.791299	0.833694	0.869876	0.317928	0.351706	0.371397	0.464504	0.30831	0.358616	0.403356	0.902535	0.062072	0.950673	0.942214	0.961237	0.957007	0.866049	0.888026	0.942555
cg01009664	3	131176303	TRH	4	0.434996	0.543538	3.7544	0.00063611	0.0499384	-0.359808	0.615858	0.180863		0.117171	0.635498	0.912331	0.706379	0.613734	0.507993	0.366491	0.463427	0.972666	0.755028	0.19279	0.178733	0.118301	0.25144	0.0997099	0.151996	0.27307	0.962087	0.321122	0.95534	0.750479	0.979673	0.956254	0.886668	0.0675639	0.936041
cg22881914	14	51605897	NID2	4	0.416971	0.63048	3.75127	0.000641762	0.0499384	-0.367771	0.700454	0.283483		0.645423	0.777292	0.984796	0.723501	0.55628	0.701582	0.645892	0.886851	0.98102	0.103035	0.294286	0.237754	0.0502518	0.397895	0.289479	0.373053	0.341663	0.979208	0.0306288	0.98363	0.98124	0.986345	0.965024	0.973713	0.523884	0.978763
cg10276549	X	150894342	GABRE	3	-0.334768	0.593014	-3.74933	0.0006453	0.0499384	-0.372721	0.30311	0.637877		0.523606	0.325982	0.114293	0.211803	0.315446	0.472737	0.558805	0.423031	0.0934307	0.161591	0.268485	0.767331	0.445737	0.533924	0.817356	0.814265	0.818043	0.936574	0.403361	0.95148	0.954255	0.957038	0.854501	0.826301	0.929889	0.939092
cg25081201	10	43187077	FXYD4	3	-0.465907	0.559714	-3.74903	0.000645852	0.0499384	-0.37349	0.298481	0.764388		0.486801	0.530363	0.0185753	0.391782	0.390949	0.0218678	0.769654	0.0245083	0.0496775	0.0240158	0.671483	0.778647	0.746477	0.663132	0.802521	0.871069	0.817387	0.978667	0.0173087	0.716596	0.809134	0.953078	0.946927	0.925912	0.183091	0.962943
cg14547335	3	10466247	ATP2B2	3	-0.423353	0.563607	-3.7463	0.000650854	0.0499384	-0.380434	0.476475	0.899828		0.652007	0.674052	0.32929	0.577919	0.553195	0.110049	0.730506	0.264028	0.112679	0.394601	0.939372	0.96376	0.92051	0.837558	0.911195	0.914576	0.811826	0.959779	0.0535395	0.212459	0.309685	0.982813	0.591533	0.15313	0.316129	0.377591
cg26128092	1	3557410	WDR8	4	0.394489	0.550041	3.74361	0.000655827	0.0499384	-0.387286	0.614981	0.220492		0.393364	0.699922	0.912592	0.640344	0.369721	0.500681	0.426721	0.709005	0.849009	0.534153	0.265138	0.202843	0.140481	0.259531	0.120307	0.257285	0.297862	0.925567	0.0487037	0.94971	0.943762	0.963295	0.946119	0.905666	0.230273	0.809022
cg11706111	16	70080645	ZNF19	3	-0.39539	0.479924	-3.74192	0.000658981	0.0499384	-0.391605	0.369626	0.765016		0.576072	0.336586	0.40952	0.496518	0.307916	0.154591	0.662058	0.127215	0.300293	0.110454	0.760698	0.797286	0.740597	0.776218	0.716687	0.788565	0.775059	0.93951	0.0803525	0.196711	0.32359	0.929044	0.45153	0.281886	0.142578	0.2965
cg22134325	11	65945321	NPAS4	3	0.384823	0.604187	3.74166	0.000659461	0.0499384	-0.392259	0.692555	0.307732		0.57841	0.776973	0.869655	0.61906	0.73418	0.639533	0.609494	0.7318	0.72121	0.592212	0.273412	0.23055	0.202725	0.384686	0.299863	0.355296	0.40759	0.932576	0.0545113	0.940804	0.918196	0.966604	0.91036	0.951985	0.122852	0.884322
cg05508084	19	61680210	ZNF667	4	0.404753	0.545376	3.74115	0.000660418	0.0499384	-0.393565	0.606981	0.202228		0.408043	0.382975	0.892193	0.454942	0.757247	0.875326	0.207585	0.856938	0.774486	0.728424	0.236641	0.191529	0.127704	0.259086	0.159272	0.210188	0.231179	0.801336	0.0959765	0.889407	0.86741	0.89169	0.845082	0.891552	0.232596	0.910959
